# Supplementary material for: Cucumber CsBPCs Regulate the Expression of CsABI3 during Seed Germination
Source: PubMed Central journal article supplement (PMC5376566; doi:10.3389/fpls.2017.00459), 2017-04-03
Supplement: Image3.pdf [file Image3.pdf]

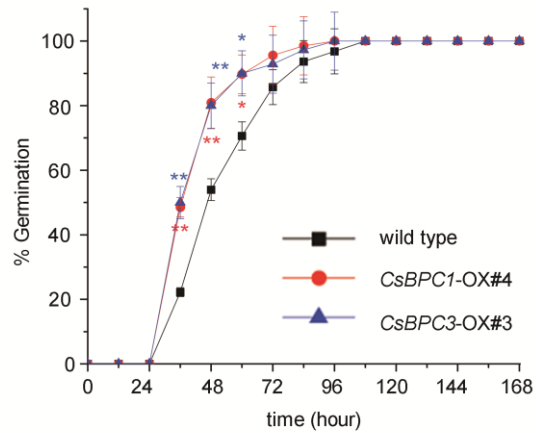

**Figure S3.** Seed germination rate of *CsBPC1-OX#4*, *CsBPC3-OX#3* and wild-type *Arabidopsis*.

Germination rates (%) of the seeds were analyzed at the indicated time points. The data represent means  $\pm$ SD s of three independent replicates (at least 50 seeds were counted for each repeat). Values significantly different from wild type are indicated. \* $p < 0.05$  and \*\* $p < 0.01$  by Bonferroni post hoc test.
